# Supplementary material for: Photo-degradation of high efficiency fullerene-free polymer solar cells
Source: Royal Society of Chemistry journal article supplement (doi:10.1039/c7nr06151j), 2017-01-01
Supplement: c7nr06151j1.pdf [file c7nr06151j1.pdf]

## Supplementary Information

### Photo-degradation of high efficiency fullerene-free polymer solar cell

Mushfika Baishakhi Upama\*, Matthew Wright, Md Arafat Mahmud, Naveen Kumar Elumalai\*, Arman Mahboubi Soufiani, Dian Wang, Cheng Xu, Ashraf Uddin

School of Photovoltaic and Renewable Energy Engineering, University of New South Wales, 2052, Sydney, Australia

**Table S1.** Photovoltaic performance parameters of the non-annealed and annealed PSCs under AM1.5G 100 mW cm<sup>-2</sup> illumination.

| Device type  | J <sub>sc</sub> (mA/cm <sup>2</sup> ) | V <sub>oc</sub> (V) | FF (%)      | Avg. PCE (%) | R <sub>s</sub> (Ω.cm <sup>2</sup> ) | R <sub>sh</sub> (Ω.cm <sup>2</sup> ) |
|--------------|---------------------------------------|---------------------|-------------|--------------|-------------------------------------|--------------------------------------|
| Non-annealed | 18.3 ± 0.12                           | 0.912 ± 0.00        | 68.8 ± 0.11 | 11.5 ± 0.06  | 4.7 ± 0.07                          | 939 ± 104                            |
| 80 °C        | 18.3 ± 0.16                           | 0.911 ± 0.00        | 66.8 ± 0.75 | 11.1 ± 0.10  | 5.8 ± 0.25                          | 789 ± 24.6                           |
| 100 °C       | 18.0 ± 0.16                           | 0.904 ± 0.00        | 62.2 ± 0.85 | 10.2 ± 0.07  | 6.9 ± 0.63                          | 462.0 ± 35.5                         |
| 120 °C       | 16.0 ± 0.28                           | 0.862 ± 0.00        | 56.3 ± 0.28 | 7.7 ± 0.28   | 8.1 ± 0.34                          | 293.6 ± 10.8                         |
| 140 °C       | 16.8 ± 0.33                           | 0.716 ± 0.01        | 49.8 ± 0.66 | 5.9 ± 0.04   | 10.5 ± 0.45                         | 188.4 ± 6.3                          |

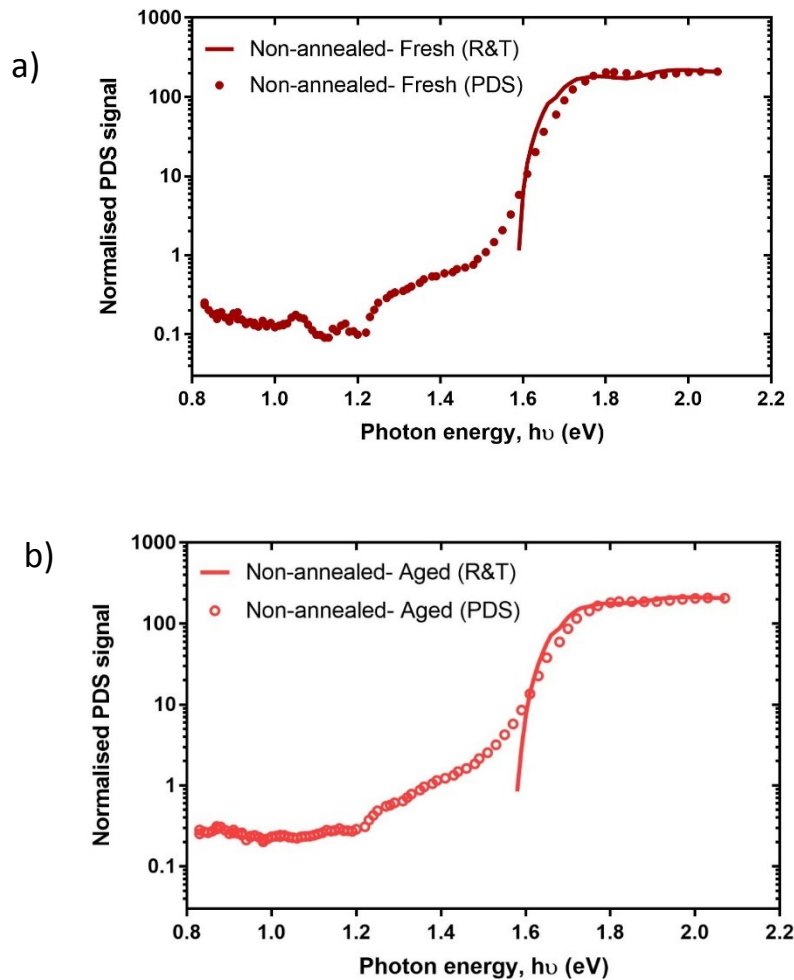

**Fig. S1** A comparison of absorbance of non-annealed PBDB-T:ITIC blend film under both (a) fresh and (b) aged conditions using R&T and Photothermal deflection spectroscopy (PDS) techniques.

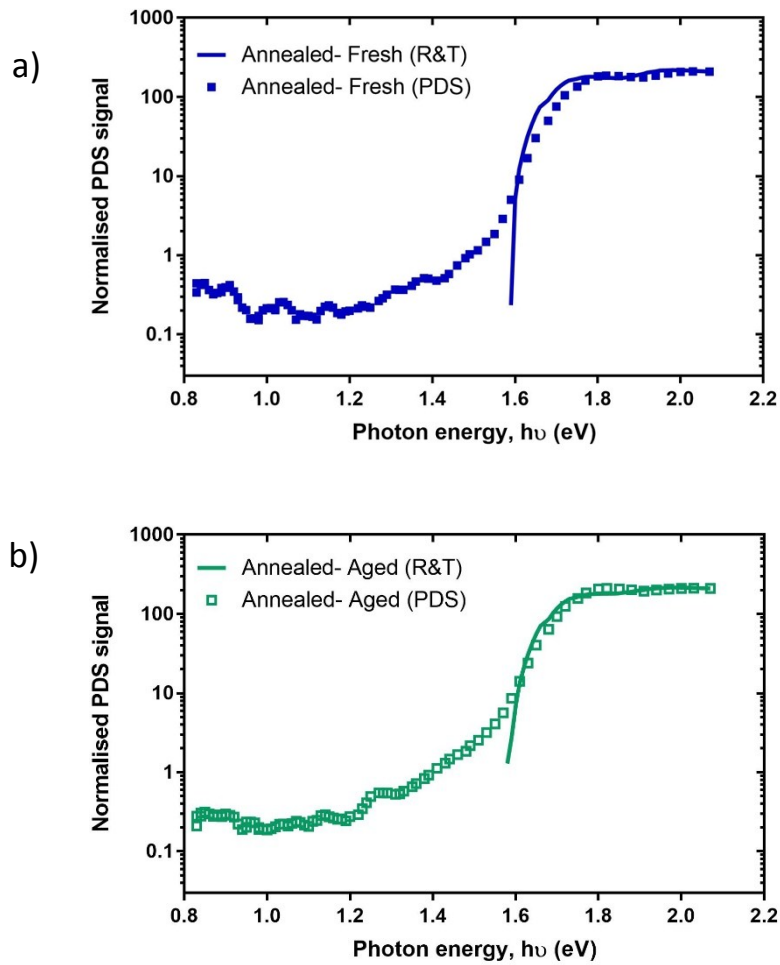

**Fig. S2** A comparison of absorbance of annealed PBDB-T:ITIC blend film under both (a) fresh and (b) aged conditions using R&T and Photothermal deflection spectroscopy (PDS) techniques.

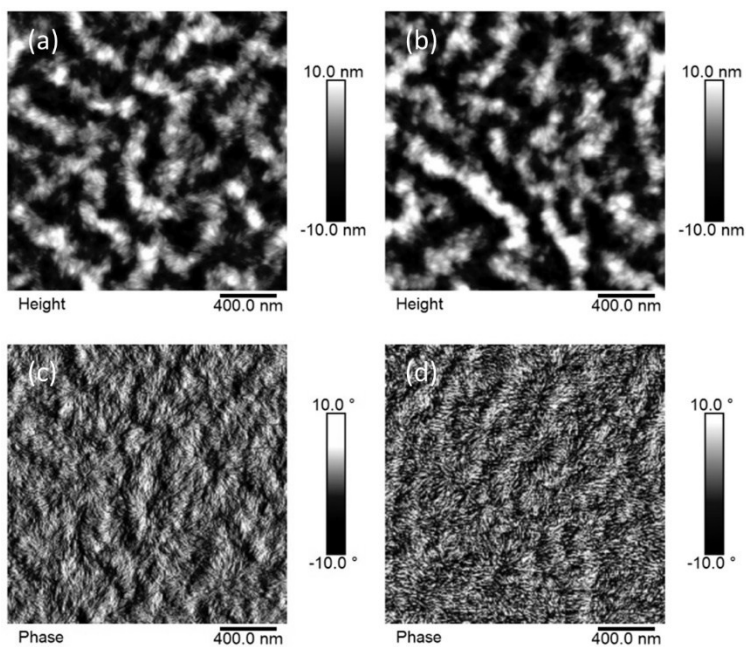

**Fig. S3** The AFM height and phase images ( $2\ \mu\text{m}\times 2\ \mu\text{m}$ ) of PBDB-T:ITIC blend films deposited on top of ITO/ZnO surface; (a, c) non-annealed film; (b, d) annealed at  $80\ ^\circ\text{C}$ .

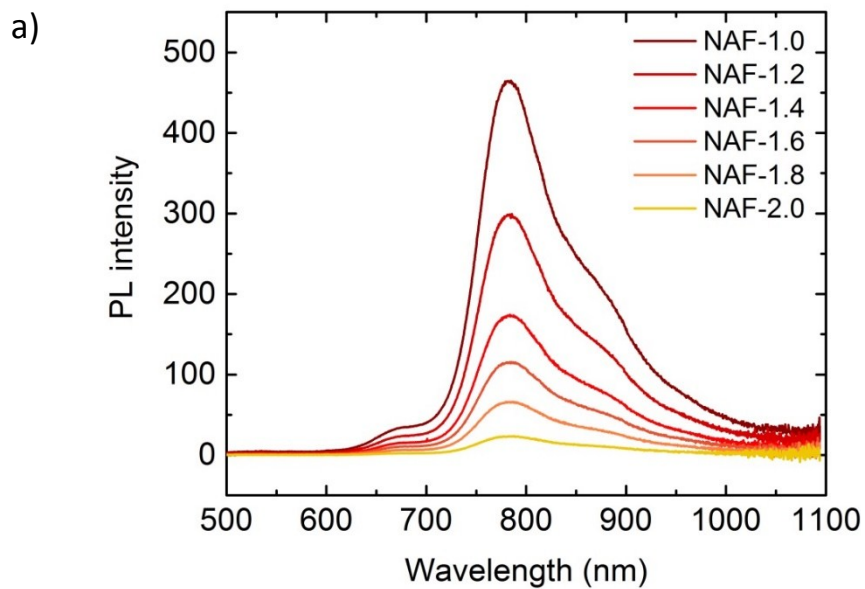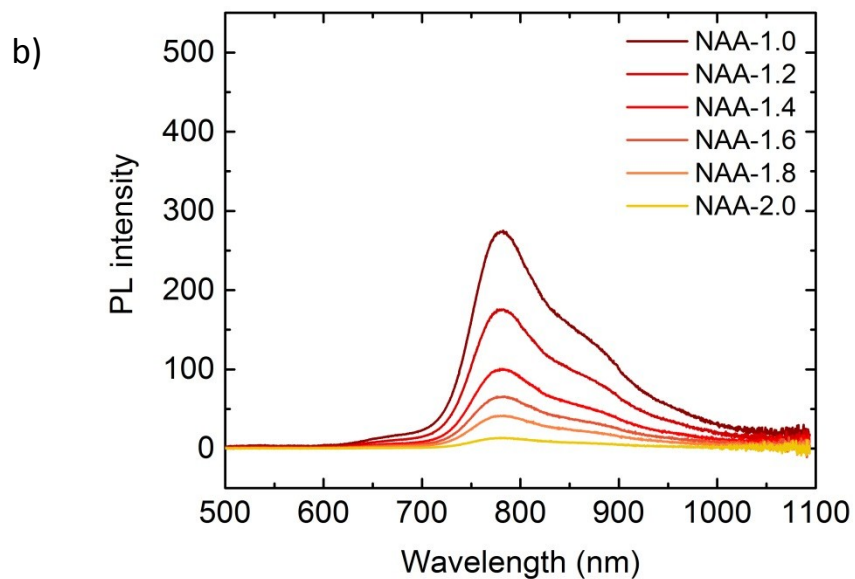

**Fig. S4** PL emission spectra of non-annealed (a) fresh and (b) aged PBDB-T:ITIC blend films at different intensities, 1 and 2 denote the highest and lowest intensity, respectively.

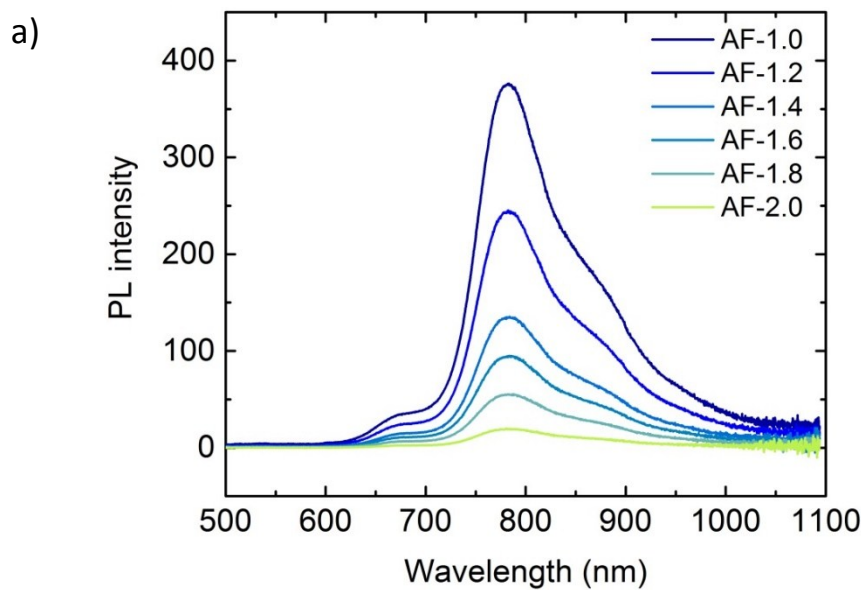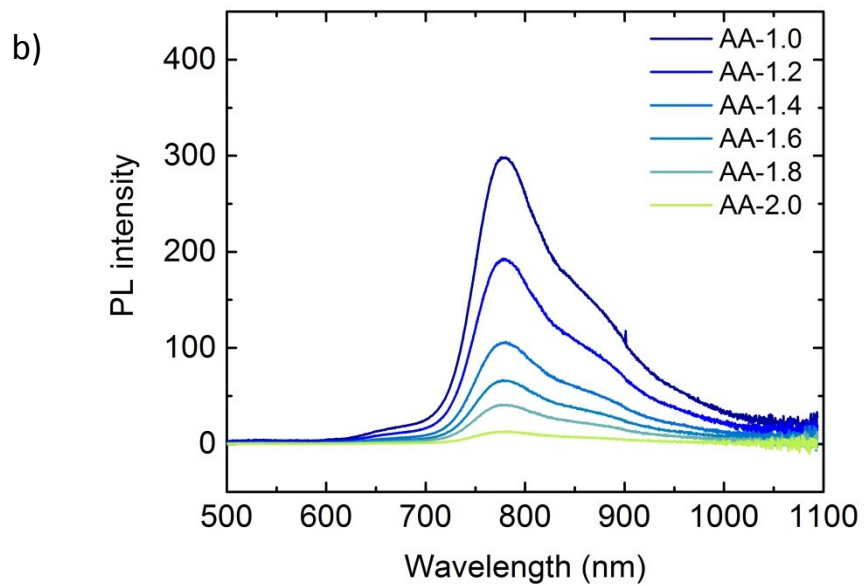

**Fig. S5** PL emission spectra of annealed (a) fresh and (b) aged PBDB-T:ITIC blend films at different intensities, 1 and 2 denote the highest and lowest intensity, respectively.
